# Supplementary material
Source: Research Square preprint supplement (doi:10.21203/rs.3.rs-9539600/v1)
Supplement: Supplementary file 1 [file 55d1b2098c592e07f3402547.docx]

Supplementary Materials for

Application of vision transformers to protein-ligand affinity prediction.

Jakub Poziemski1 and Pawel Siedlecki1*

1 Institute of Biochemistry and Biophysics, Polish Academy of Sciences, Warsaw, Poland

* corresponding author: pawel@ibb.waw.pl

# Datasets analysis

Comparison of training, validation and two test sets (CASF_2016 and CoreSet_2013) with respect to affinity values (S1) ligand similarity (S2) and datasets ligand diversity (S3).


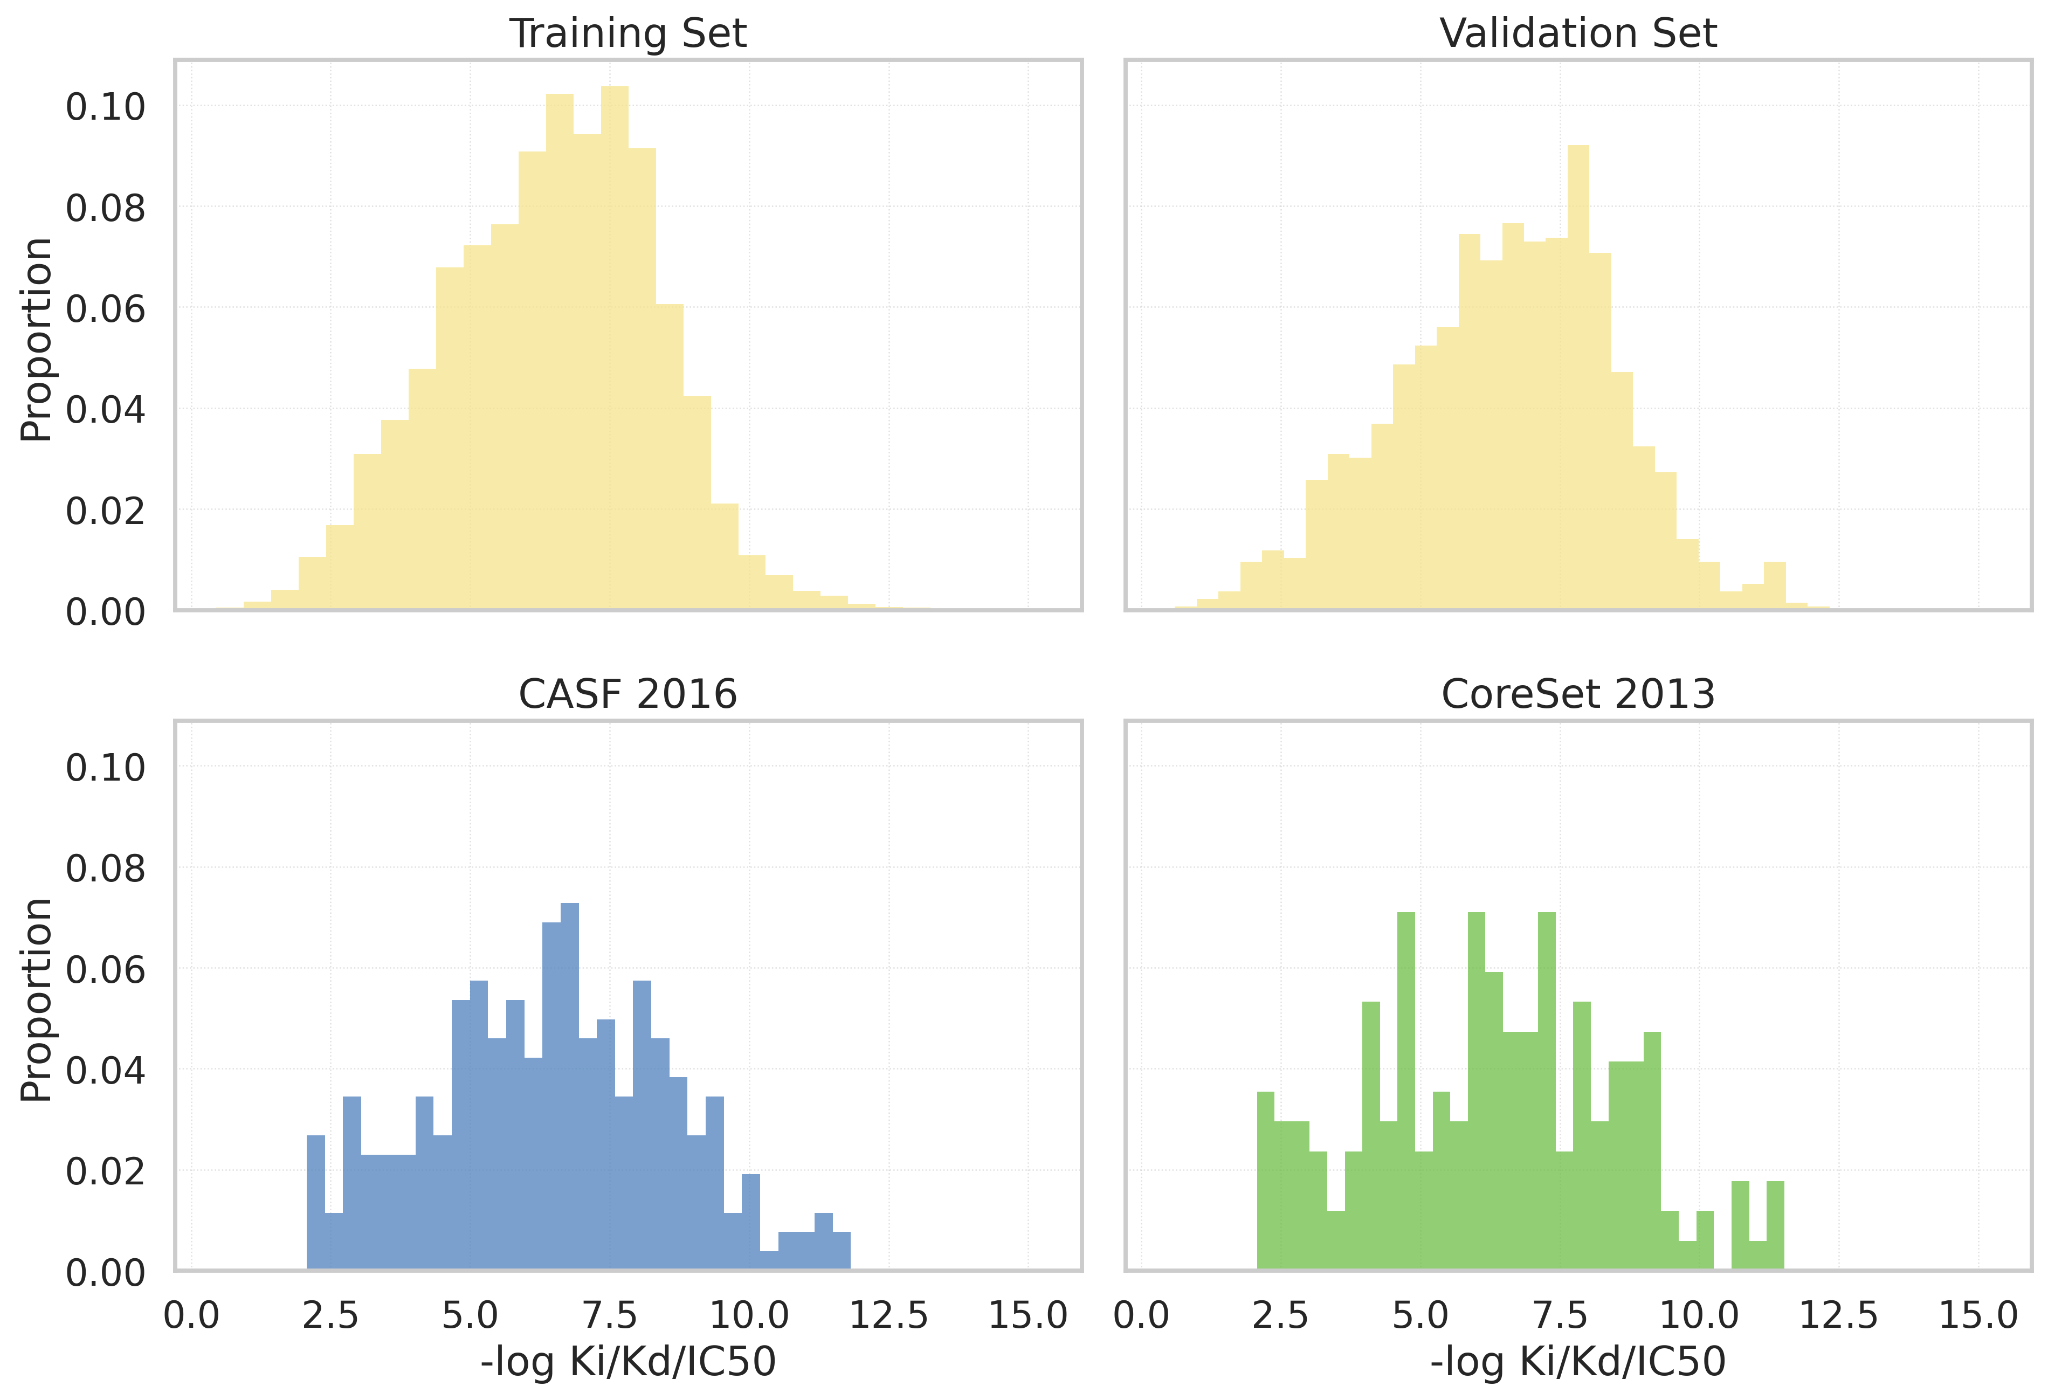


**Supplementary Figure S1.** **Distribution of affinity values across training, validation and test sets.**


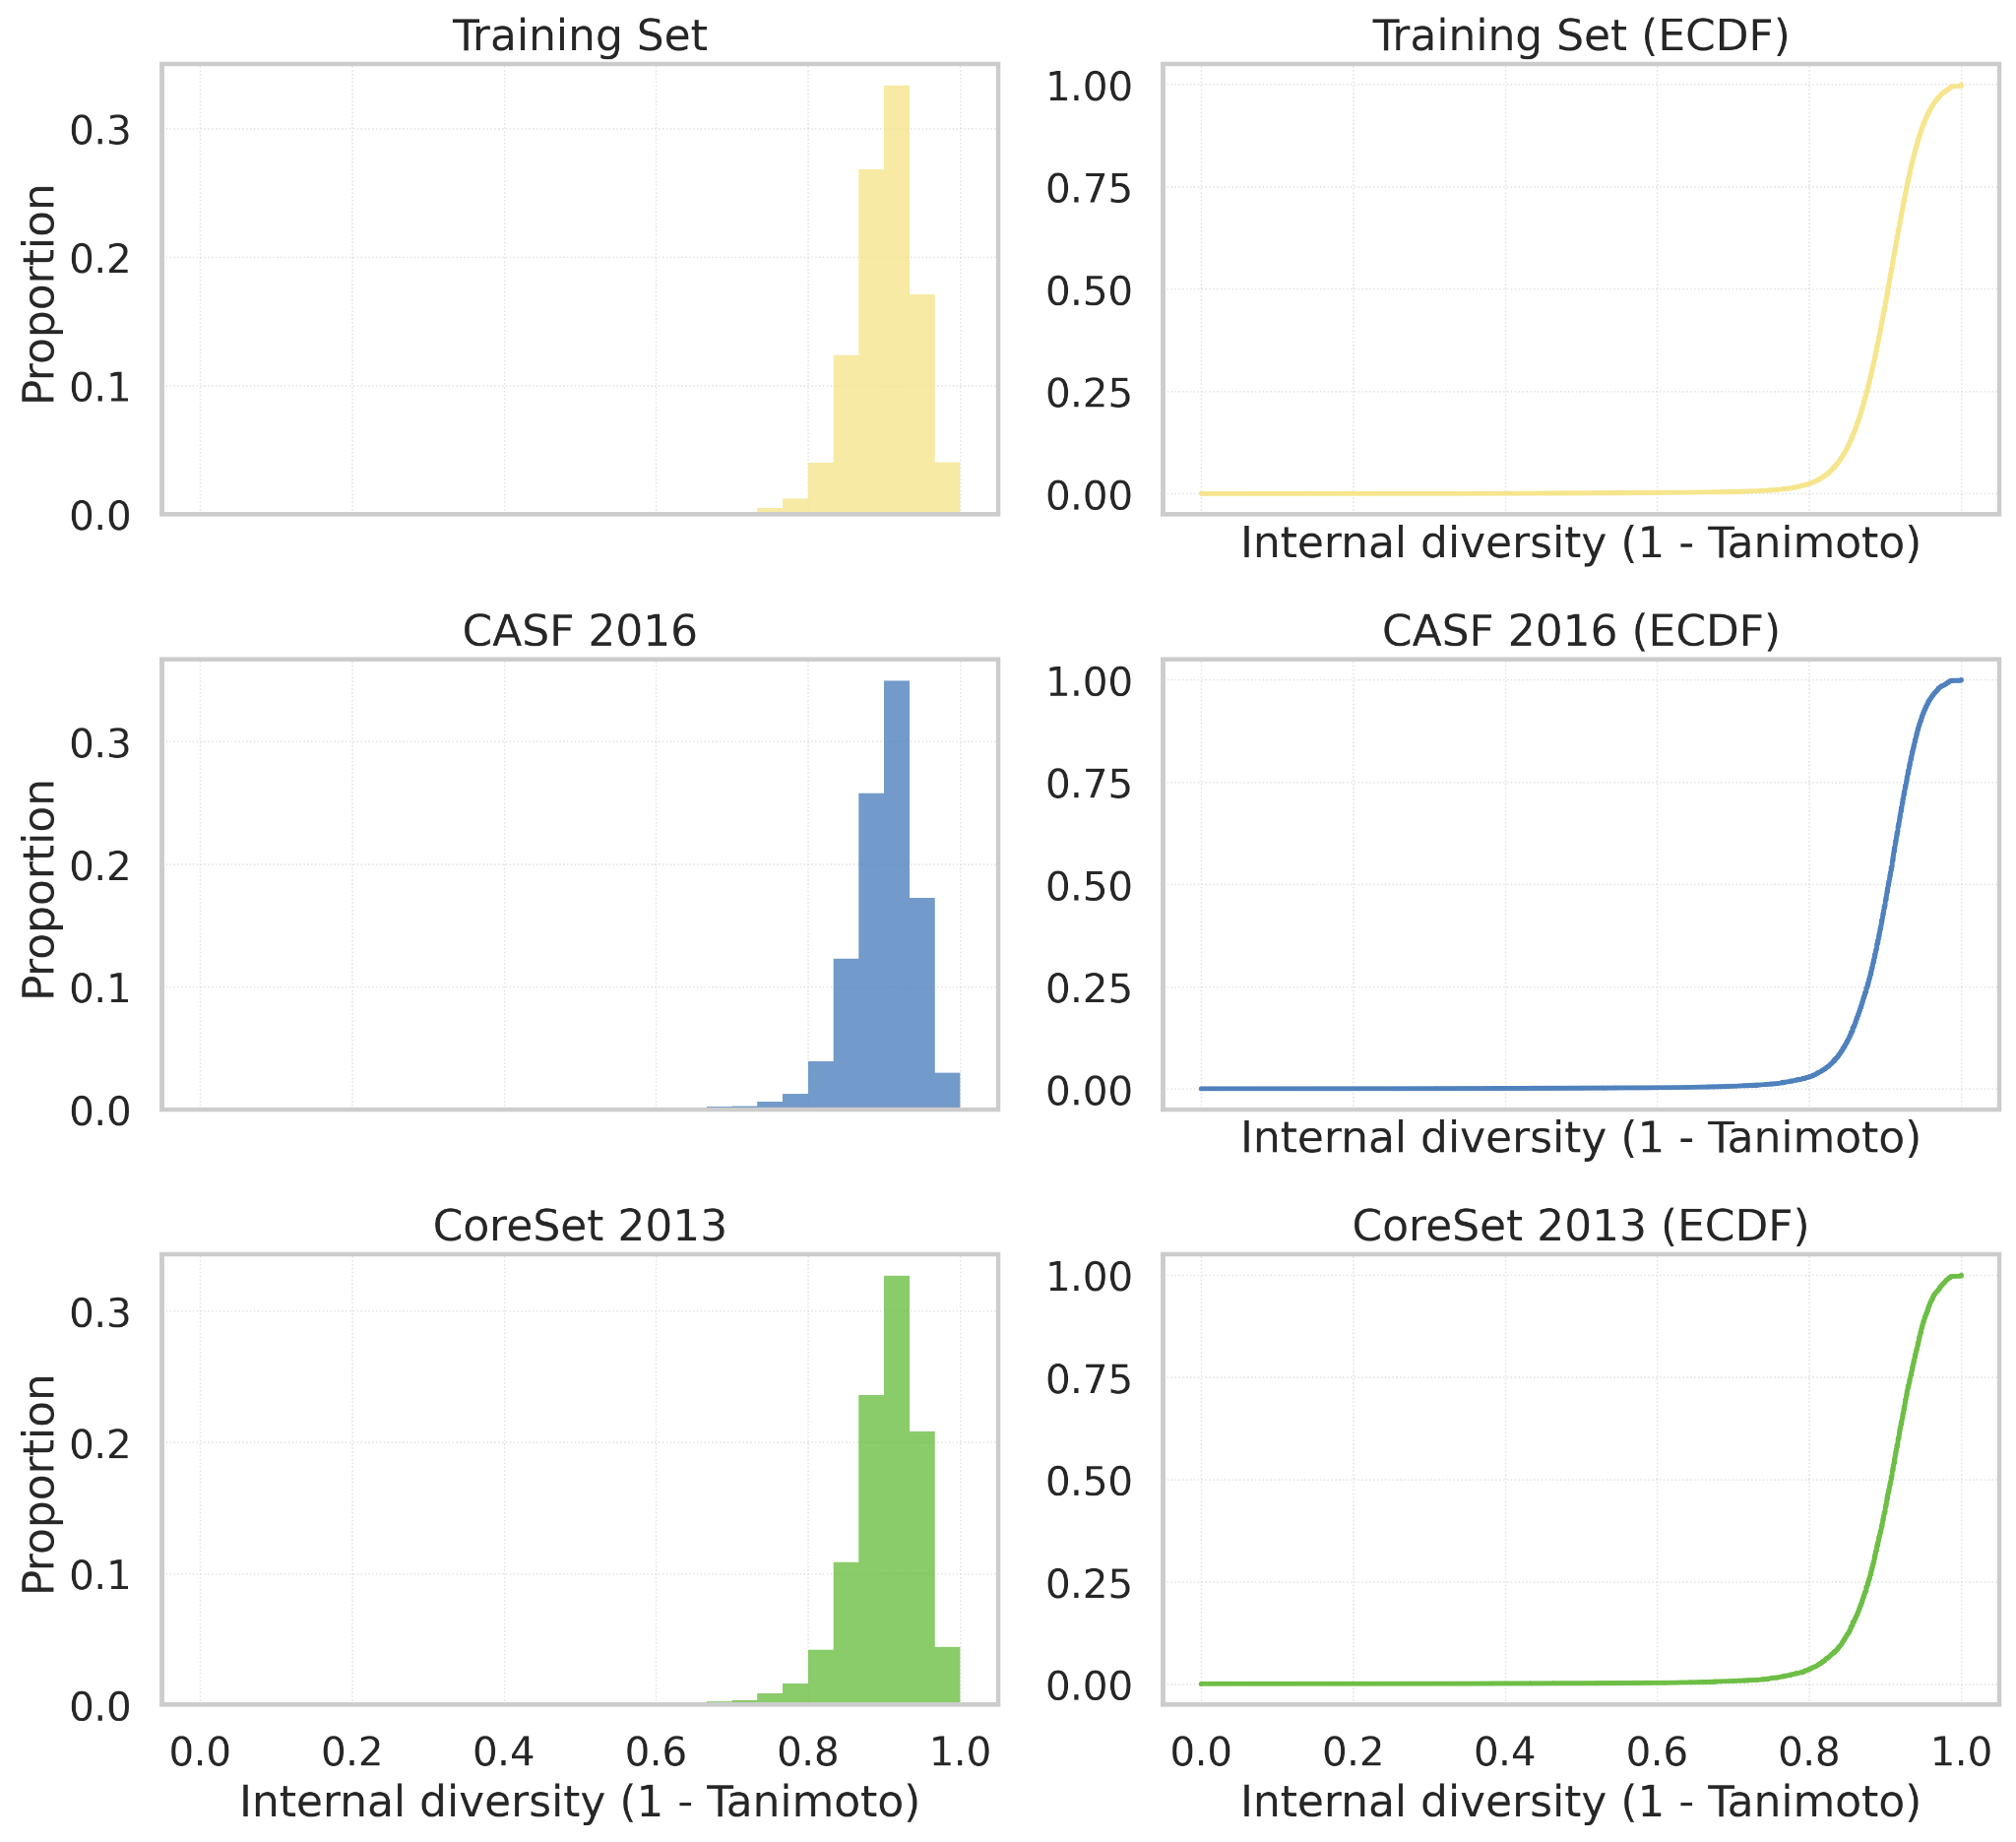


**Supplementary Figure S2. Ligand internal diversity assessment.** Internal ligand diversity within the training set (top row) and two test sets: CASF_2016 (middle row) and CoreSet_2013 (bottom row).


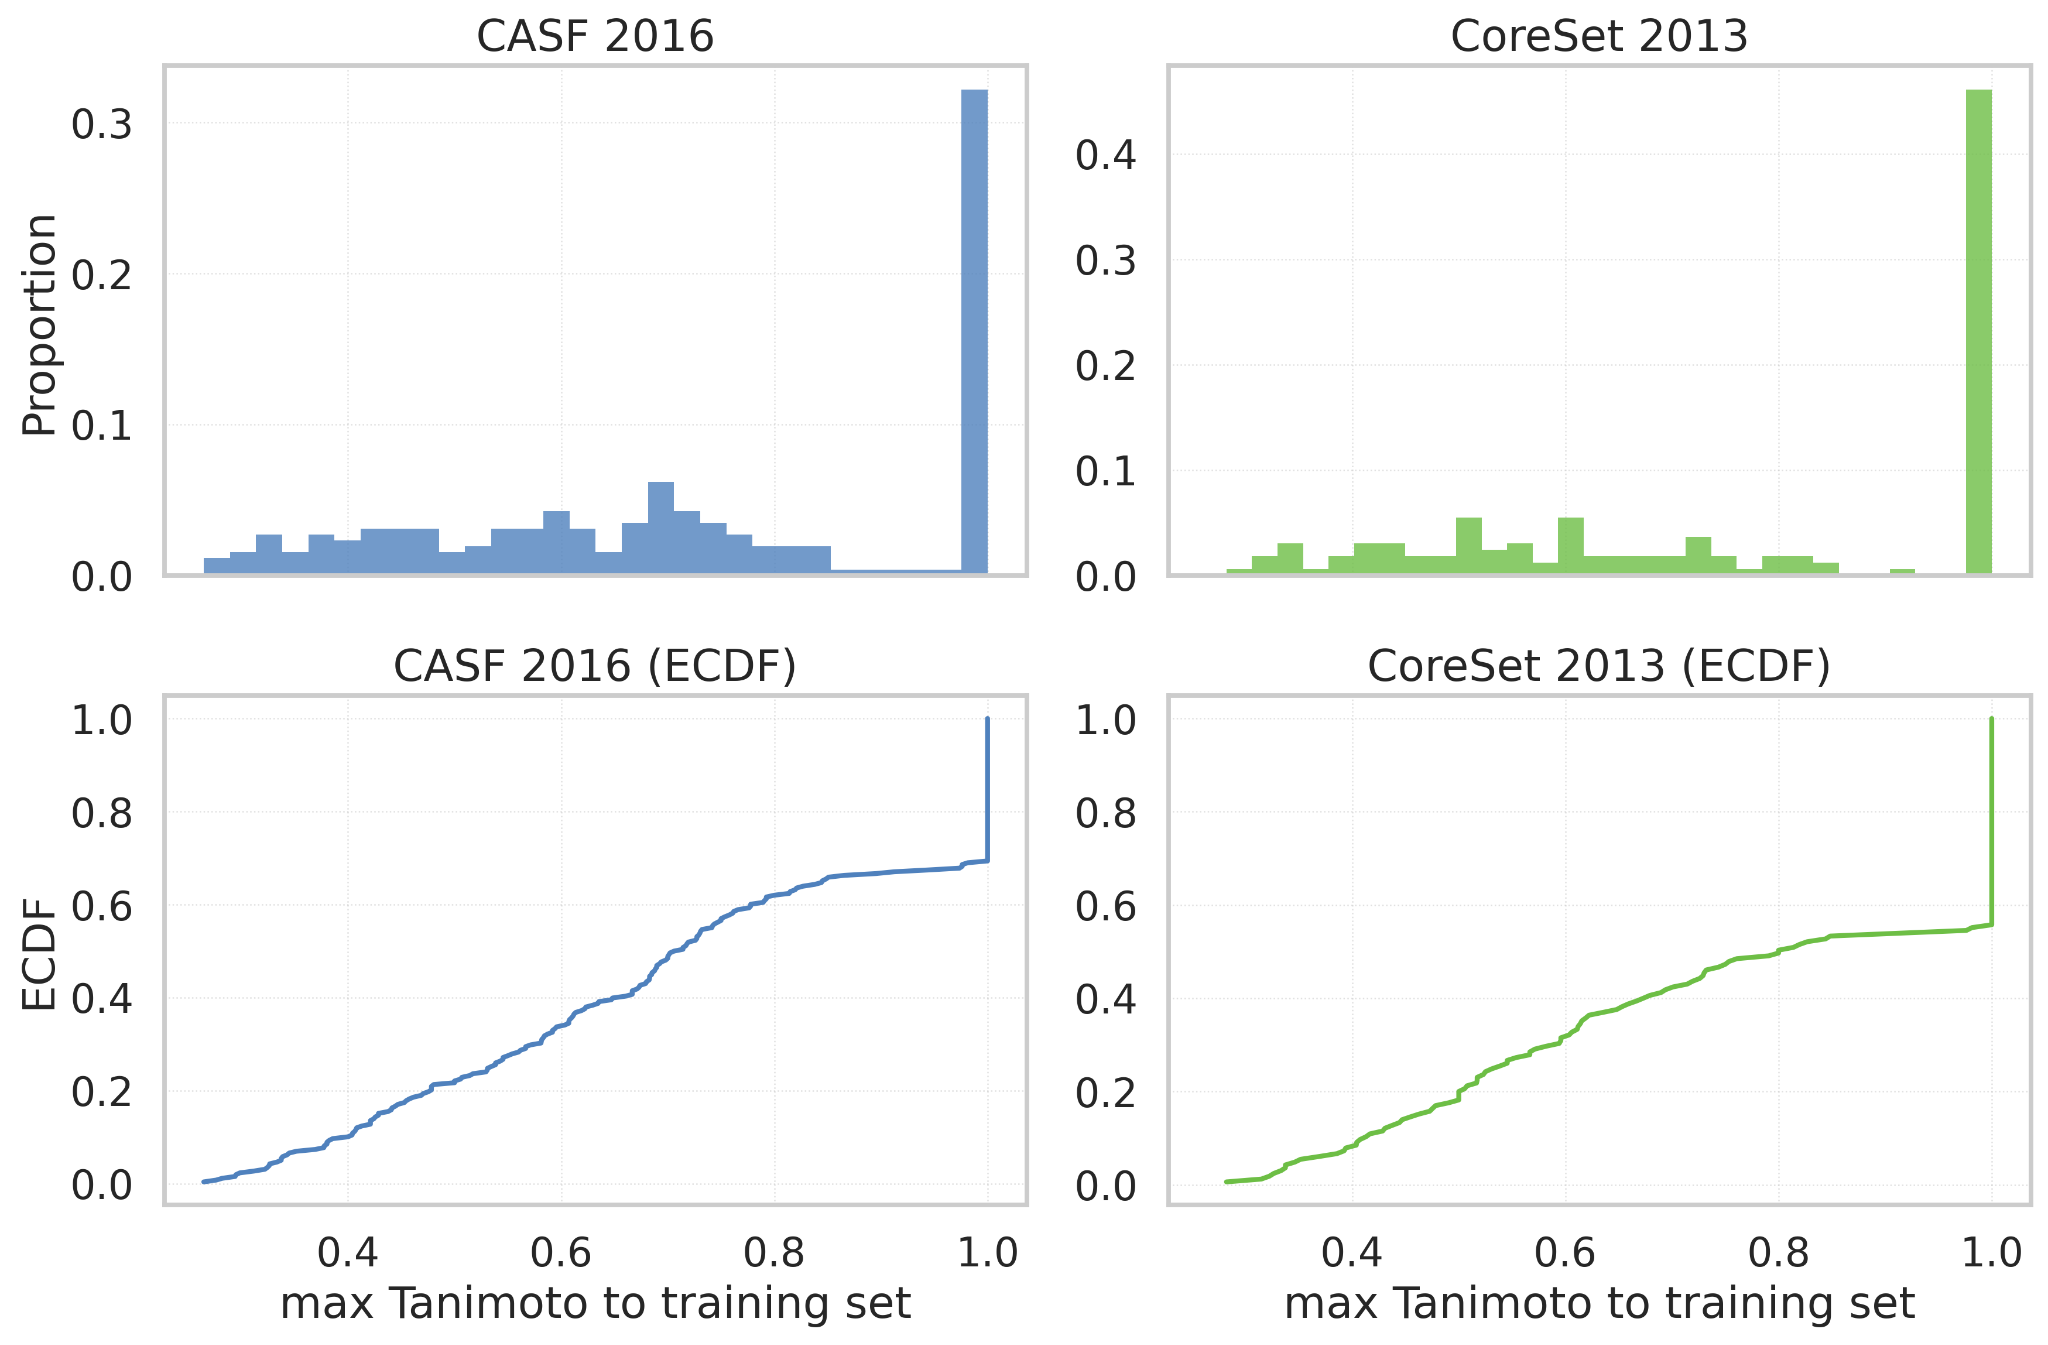


**Supplementary Figure S3: Ligand similarity between training and test sets.** Distribution of the maximum Tanimoto similarity (ECFP4 1024 bit) to the training set, computed as the nearest-neighbor similarity for ligands from CASF_2016 and CoreSet_2013. The top row shows histogram proportions, the bottom row plots a cumulative proportion with the empirical cumulative distribution function (ECDF).

| **Selected for generalization** | | **Most similar target in training set** | |  |
| --- | --- | --- | --- | --- |
| PDB_ID | Ligand_res_ID | PDB_ID | Ligand_res_ID | Similarity |
| **2cbv** | CGB | 4ufl | DZX | 0.26 |
| **3ui7** | C1L | 5hlp | 65A | 0.28 |
| **3acw** | 651 | 4mmm | BP7 | 0.28 |
| **3pyy** | 3YY | 3f81 | STT | 0.29 |
| **3uuo** | 0CV | 6d59 | FVJ | 0.29 |
| **4mme** | 29Q | 5ea6 | 5NP | 0.30 |
| **4qd6** | 30T | 2xj1 | XJ1 | 0.31 |
| **5aba** | UL7 | 4agm | P86 | 0.32 |
| **4jfs** | 16Z | 1sv3 | ANN | 0.32 |
| **3jya** | LWG | 5aqn | JG8 | 0.33 |
| **3g2z** | GZ2 | 3p2h | NOO | 0.33 |
| **3gy4** | PBZ | 5mnc | ANL | 0.33 |
| **2xnb** | Y8L | 2xmy | CDK | 0.34 |
| **2p4y** | C03 | 4g2r | H1L | 0.34 |
| **4wiv** | 3P2 | 6g2c | EHT | 0.34 |
| **3fur** | Z12 | 2bz5 | AB4 | 0.34 |
| **4ih5** | 12R | 3wf5 | FZ8 | 0.34 |
| **1mq6** | XLD | 1mq5 | XLC | 0.35 |
| **3k5v** | STJ | 3exo | 5MS | 0.37 |
| **3jvr** | AGX | 6f8b | CXH | 0.38 |

**Supplementary Table S1: Selected CASF 2016 structures for testing ligand generalization. ‘**Similarity’ refers to maximum Tanimoto similarity for a single training example.

| **Selected for generalization** | **Most similar targets in training set** | | | | | |
| --- | --- | --- | --- | --- | --- | --- |
| PDB_ID | PDB_ID | TM-Score | PDB_ID | TM-Score | PDB_ID | TM-Score |
| **4u4s** | 4x48 | 0.9859 | 4u4x | 0.9686 | 3qxm | 0.3671 |
| **1sqa** | 1sqo | 0.9992 | 1owe | 0.9989 | 3v7t | 0.3205 |
| **1owh** | 1owe | 0.9995 | 1sqo | 0.9985 | 3v7t | 0.3205 |
| **2x0y** | 2vur | 0.9979 | 2xpk | 0.9883 | 4ibe | 0.2624 |
| **2j62** | 2xpk | 0.9986 | 2vur | 0.9877 | 4ibe | 0.2663 |
| **4gqq** | 1u2y | 0.9775 | 4gqr | 0.9775 | 1swi | 0.3558 |
| **2cbj** | 2xpk | 0.9956 | 2vur | 0.9894 | 4ibe | 0.2668 |
| **1xd0** | 1u2y | 0.9996 | 4gqr | 0.9974 | 1swi | 0.3506 |
| **1u33** | 4gqr | 0.9987 | 1u2y | 0.9984 | 1swi | 0.3553 |
| **1sqa** | 1sqo | 0.9992 | 1owe | 0.9989 | 3v7t | 0.3205 |
| **1qi0** | 8a3h | 0.9918 | 5a3h | 0.9917 | 2bfr | 0.3630 |
| **1kel** | 1flr | 0.9701 | 2cgr | 0.7629 | 4jn2 | 0.5503 |
| **3l4u** | 3l4x | 0.9994 | 3l4y | 0.9994 | 3ctt | 0.9993 |
| **2qmj** | 3l4x | 0.9999 | 3l4y | 0.9997 | 3ctt | 0.9997 |
| **3l4w** | 3ctt | 0.9991 | 3l4x | 0.9991 | 3l4y | 0.9991 |
| **2vo5** | 2vmf | 0.9959 | 2vqt | 0.9948 | 2vjx | 0.9948 |
| **2vot** | 2vqt | 0.9987 | 2vjx | 0.9985 | 2vmf | 0.9984 |
| **2vl4** | 2vmf | 0.9984 | 2vjx | 0.9981 | 2vqt | 0.9981 |

**Supplementary Table S2:** Selected structures for testing generalization based on protein structure similarity (based on TM-Score).


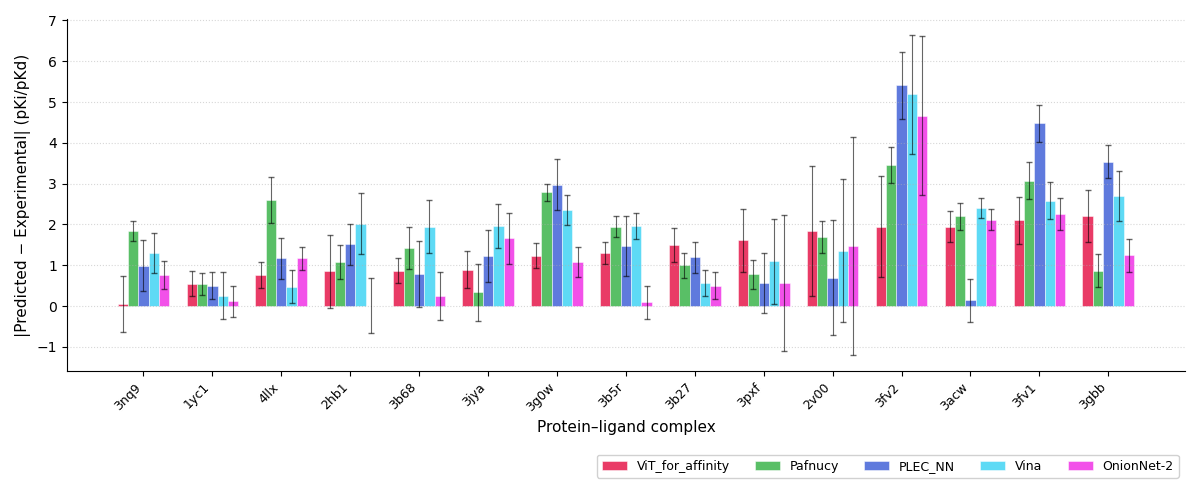


**Supplementary Figure S4: Mean prediction based on 10 cluster representative conformations derived from MD simulation.**


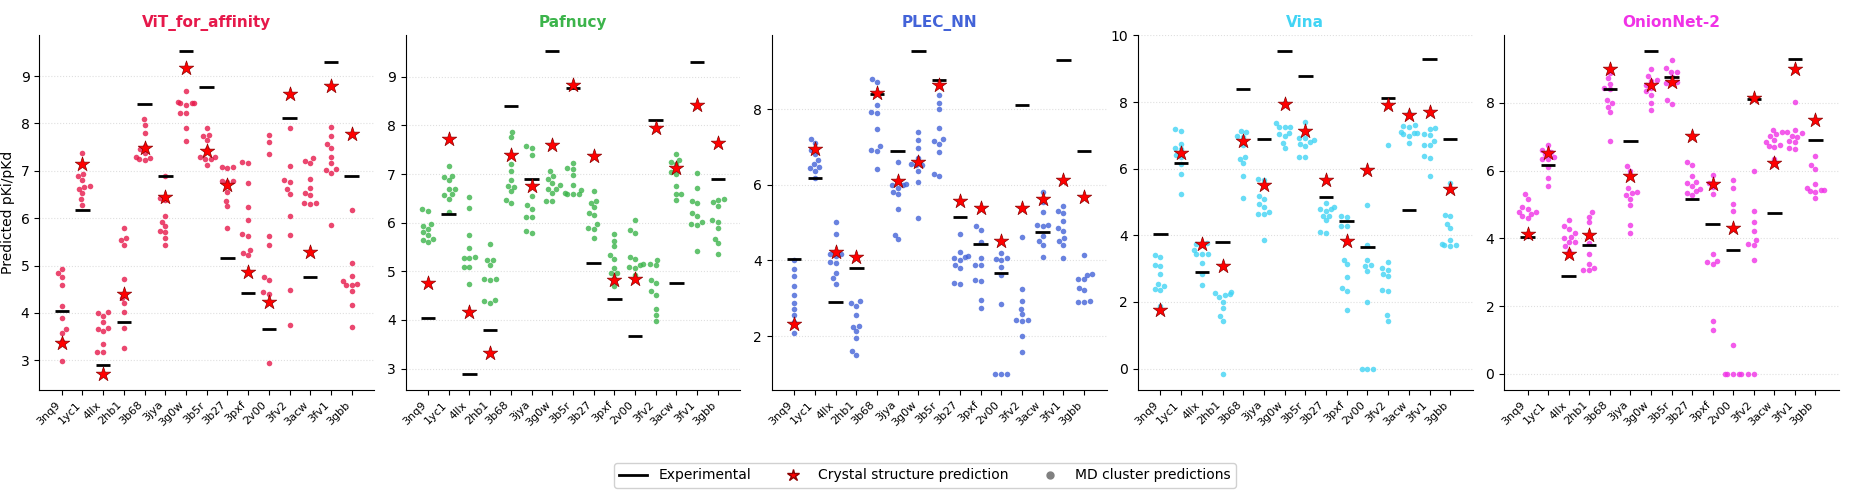


**Supplementary Figure S5: Detailed analysis of affinity prediction for each model tested.** Predicted affinity values are shown for each of the 10 representative conformations derived from MD simulations.
